# Supplementary material for: Multivisceral Resection for Locally Advanced Gastric Cancer: A Systematic Review and Evidence Quality Assessment
Source: MDPI journal article supplement (doi:10.3390/jcm12237360), 2023-11-28
Supplement: s1 [file s1]

|                 |   |   |   |   |   |   |   |   |   |   |      |
|-----------------|---|---|---|---|---|---|---|---|---|---|------|
| <b>L. Xiao</b>  | 1 | 1 | 1 | 1 | 1 | 1 | 1 | 1 | 1 | 9 | Good |
| <b>H. Xiao</b>  | 1 | 1 | 1 | 1 | 1 | 1 | 1 | 1 | 1 | 9 | Good |
| <b>Ozer</b>     | 1 | 1 | 1 | 1 | 1 | 1 | 1 | 1 | 1 | 9 | Good |
| <b>Saito</b>    | 1 | 1 | 1 | 1 | 1 | 1 | 0 | 1 | 1 | 8 | Good |
| <b>Sahakyan</b> | 1 | 1 | 1 | 1 | 1 | 1 | 1 | 1 | 1 | 9 | Good |
| <b>Ocana</b>    | 1 | 0 | 1 | 1 | 0 | 1 | 1 | 1 | 0 | 6 | Fair |
| <b>Tran</b>     | 1 | 1 | 1 | 1 | 1 | 1 | 1 | 1 | 1 | 9 | Good |

The NHLBI scale ranges from 1-9; with a score of 1-3 denoting poor quality, 4-6 fairquality,and 7-9 suggesting high quality.

NHLBI: National Heart, Lung, and Blood Institute

**Supplemental Table 2:** Survival rates based on R resection.

| Authors               | Survival based on R resection                           |                                          |
|-----------------------|---------------------------------------------------------|------------------------------------------|
|                       | R0 resection                                            | R+ resection                             |
| Carboni et al. (4)    | R0= 30.6% (p=0.001)                                     | R+=0%                                    |
| Dias et al. (26)      | R0=56.9%                                                | R+=28.6%                                 |
| Kobayasbi et al. (27) | R0 better survival (P=0.004)                            | NM                                       |
| Mita et al. (22)      | R0=78.3% (1-year)<br>R0= 47.7% (3-year) (P<0.002)       | R1= 46.6% (1-year)<br>R1= 14.3% (3-year) |
| Pacelli et al. (8)    | R0= 43.7% (5-year) (P=0 .001)                           | R1=31.4 % (5-year)                       |
| Wang et al. (20)      | R0-resection (P=0.0174)                                 | NM                                       |
| Yang et al. (21)      | R0 better survival (P < 0.05)                           | NM                                       |
| Mita et al. (30)      | R0=78.1 (1-year) (P .001)<br>R0= 62.1 (3-year) (P .001) | R+=8.6% (1-year)<br>R+=0 (3-year)        |
| Xiao et al.(10)       | R0=68.2% (1-Year) (P =0.030)                            | R+=41.9% (1-year)                        |
| Xiao et al. (23)      | R0=34 months (P = 0.004)                                | R1=11 months                             |
